# Supplementary material for: Integrative Analysis of the Wheat PHT1 Gene Family Reveals A Novel Member Involved in Arbuscular Mycorrhizal Phosphate Transport and Immunity
Source: PubMed Central journal article supplement (PMC6562588; doi:10.3390/cells8050490), 2019-05-22
Supplement: cells-08-00490-s001.pdf [file cells-08-00490-s001.pdf]

Article

# **Integrative analysis of the wheat *PHT1* gene family reveals a novel member involved in arbuscular mycorrhizal phosphate transport and immunity**

**Yi Zhang<sup>1,2,3</sup>, Lizong Hu<sup>2,3</sup>, Deshui Yu<sup>2,3</sup>, Kedong Xu<sup>2,3</sup>, Ju Zhang<sup>2,3</sup>, Xiaoli Li<sup>2,3</sup>, Pengfei Wang<sup>1</sup>, Guo Chen<sup>2,3</sup>, Zhihui Liu<sup>2,3</sup>, Chunfeng Peng<sup>2,3</sup>, Chengwei Li<sup>1,2,3,4\*</sup>, and Tiancai Guo<sup>1\*</sup>**

<sup>1</sup>The Collaborative Innovation Center of Henan Food Crops, Henan Agricultural University, Zhengzhou, 450002, China

<sup>2</sup>Key Laboratory of Plant Genetics and Molecular Breeding, Zhoukou Normal University, Zhoukou, 466001, China

<sup>3</sup>Henan Key Laboratory of Crop Molecular Breeding & Bioreactor, Zhoukou, 466001, China

<sup>4</sup>Henan Engineering Research Center of Grain Crop Genome Editing, Henan Institute of Science and Technology, Xinxiang, 453003, China

\* Correspondence: E-mail: lichengwei@163.com, guotiancai@henau.edu.cn

Table S1. Characteristics of the wheat PHT1 gene family.

| Gene name | Gene stable ID     | Chromosome name | Gene start (bp) | Gene end (bp) | Strand | Length of ORF sequence (bp) | Length of amino acids sequence (AA) | Transmembrane domains | Best blast hit with <i>Oryza sativa</i> PHT1 (Identity in %) | Best blast hit with <i>O. sativa</i> PHT1 (E-value) | PHT1 signature GGDYPLSA ATIXSE |
|-----------|--------------------|-----------------|-----------------|---------------|--------|-----------------------------|-------------------------------------|-----------------------|--------------------------------------------------------------|-----------------------------------------------------|--------------------------------|
| TaPT1-2B  | TraesCS2B02G059100 | 2B              | 28725167        | 28729269      | -1     | 1530                        | 509                                 | 11                    | OsPT13(71)                                                   | 0                                                   | GGDYPLSA<br>TIMSE              |
| TaPT2-2D  | TraesCS2D02G045600 | 2D              | 16588730        | 16590442      | -1     | 1590                        | 529                                 | 11                    | OsPT13(70)                                                   | 0                                                   | GGDYPLSA<br>TIMSE              |
| TaPT3-2D  | TraesCS2D02G045700 | 2D              | 16658676        | 16660359      | 1      | 1566                        | 521                                 | 12                    | OsPT4(60)                                                    | 0                                                   | GGDYPLSA<br>TIMAE              |
| TaPT4-4A  | TraesCS4A02G301100 | 4A              | 598435208       | 598437212     | -1     | 1584                        | 527                                 | 12                    | OsPT8(60)                                                    | 0                                                   | GGDYPLSA<br>TIMSE              |
| TaPT5-4A  | TraesCS4A02G359900 | 4A              | 632989596       | 632991508     | 1      | 1515                        | 504                                 | 11                    | OsPT8(87)                                                    | 0                                                   | GGDYPLSA<br>TIMSE              |
| TaPT6-4A  | TraesCS4A02G360000 | 4A              | 632998265       | 632999875     | -1     | 1611                        | 536                                 | 11                    | OsPT8(87)                                                    | 0                                                   | GGDYPLSA<br>TIMSE              |
| TaPT7-4A  | TraesCS4A02G416300 | 4A              | 685939441       | 685941006     | -1     | 1506                        | 501                                 | 11                    | OsPT2(77)                                                    | 0                                                   | GGDYPLSA<br>TIMSE              |
| TaPT8-4A  | TraesCS4A02G416400 | 4A              | 685996965       | 685998797     | -1     | 1566                        | 521                                 | 12                    | OsPT2(81)                                                    | 0                                                   | GGDYPLSA<br>TIMSE              |
| TaPT9-4A  | TraesCS4A02G416500 | 4A              | 686138336       | 686140164     | -1     | 1578                        | 525                                 | 12                    | OsPT2(81)                                                    | 0                                                   | GGDYPLSA<br>TIMSE              |
| TaPT10-4A | TraesCS4A02G416600 | 4A              | 686168444       | 686170214     | -1     | 1578                        | 525                                 | 12                    | OsPT2(81)                                                    | 0                                                   | GGDYPLSA<br>TIMSE              |
| TaPT11-4A | TraesCS4A02G417900 | 4A              | 687813492       | 687832443     | 1      | 1671                        | 556                                 | 12                    | OsPT13(65)                                                   | 5.49E-179                                           | GGDYPLSA<br>TIMSE              |
| TaPT12-4A | TraesCS4A02G418000 | 4A              | 687892533       | 687894351     | 1      | 1674                        | 557                                 | 10                    | OsPT13(64)                                                   | 0                                                   | GGDYPLSA<br>TIMSE              |
| TaPT13-4A | TraesCS4A02G418300 | 4A              | 688325963       | 688327706     | -1     | 1596                        | 531                                 | 9                     | OsPT13(63)                                                   | 0                                                   | GGDYPLSA<br>TIMSE              |
| TaPT14-4A | TraesCS4A02G418400 | 4A              | 688373566       | 688375384     | -1     | 1671                        | 556                                 | 10                    | OsPT13(62)                                                   | 0                                                   | GGDYPLSA<br>TIMSE              |
| TaPT15-4B | TraesCS4B02G013200 | 4B              | 9385719         | 9388103       | 1      | 1665                        | 554                                 | 12                    | OsPT8(60)                                                    | 0                                                   | GGDYPLSA<br>TIMSE              |
| TaPT16-4B | TraesCS4B02G317000 | 4B              | 606816672       | 606818496     | -1     | 1566                        | 521                                 | 12                    | OsPT2(81)                                                    | 0                                                   | GGDYPLSA<br>TIMSE              |

|           |                        |    |           |           |    |      |     |    |            |   |                   |
|-----------|------------------------|----|-----------|-----------|----|------|-----|----|------------|---|-------------------|
| TaPT17-4B | TraesCS4B<br>02G317100 | 4B | 606866119 | 606867696 | -1 | 1578 | 525 | 12 | OsPT2(81)  | 0 | GGDYPLSA<br>TIMSE |
| TaPT18-4B | TraesCS4B<br>02G317200 | 4B | 606907389 | 606909200 | -1 | 1578 | 525 | 11 | OsPT2(81)  | 0 | GGDYPLSA<br>TIMSE |
| TaPT19-4D | TraesCS4D<br>02G010900 | 4D | 5288175   | 5290392   | -1 | 1584 | 527 | 12 | OsPT8(60)  | 0 | GGDYPLSA<br>TIMSE |
| TaPT20-4D | TraesCS4D<br>02G313700 | 4D | 479635733 | 479637298 | -1 | 1566 | 521 | 12 | OsPT2(81)  | 0 | GGDYPLSA<br>TIMSE |
| TaPT21-4D | TraesCS4D<br>02G313800 | 4D | 479674652 | 479676505 | -1 | 1578 | 525 | 12 | OsPT2(81)  | 0 | GGDYPLSA<br>TIMSE |
| TaPT22-5A | TraesCS5A<br>02G460300 | 5A | 640724647 | 640726263 | 1  | 1617 | 538 | 12 | OsPT8(81)  | 0 | GGDYPLSA<br>TIMSE |
| TaPT23-5B | TraesCS5B<br>02G470100 | 5B | 643459208 | 643462655 | 1  | 1608 | 535 | 12 | OsPT8(80)  | 0 | GGDYPLSA<br>TIMSE |
| TaPT24-5B | TraesCS5B<br>02G512000 | 5B | 677537337 | 677539246 | 1  | 1614 | 537 | 11 | OsPT8(87)  | 0 | GGDYPLSA<br>TIMSE |
| TaPT25-5B | TraesCS5B<br>02G512100 | 5B | 677542981 | 677545165 | -1 | 1509 | 503 | 10 | OsPT8(87)  | 0 | GGDYPLSA<br>TIMSE |
| TaPT26-5D | TraesCS5D<br>02G472000 | 5D | 512532864 | 512536289 | 1  | 1587 | 529 | 11 | OsPT8(80)  | 0 | GGDYPLSA<br>TIMSE |
| TaPT27-5D | TraesCS5D<br>02G512900 | 5D | 537087947 | 537089896 | 1  | 1410 | 470 | 9  | OsPT8(88)  | 0 | GGDYPLSA<br>TIMSE |
| TaPT28-5D | TraesCS5D<br>02G513000 | 5D | 537161285 | 537162607 | -1 | 1410 | 470 | 9  | OsPT8(87)  | 0 | GGDYPLSA<br>TIMSE |
| TaPT29-6A | TraesCS6A<br>02G223800 | 6A | 420820498 | 420822475 | -1 | 1602 | 533 | 12 | OsPT8(64)  | 0 | GGDYPLSA<br>TIISE |
| TaPht-myc | TraesCS6B<br>02G257500 | 6B | 462035116 | 462036717 | 1  | 1602 | 533 | 12 | OsPT8(64)  | 0 | GGDYPLSA<br>TIISE |
| TaPT30-6D | TraesCS6D<br>02G211600 | 6D | 298924441 | 298926287 | 1  | 1602 | 533 | 12 | OsPT8(64)  | 0 | GGDYPLSA<br>TIISE |
| TaPT31-7A | TraesCS7A<br>02G070000 | 7A | 35696602  | 35698417  | 1  | 1671 | 556 | 10 | OsPT13(64) | 0 | GGDYPLSA<br>TIMSE |
| TaPT32-7D | TraesCS7D<br>02G064200 | 7D | 35551430  | 35553485  | 1  | 1668 | 555 | 9  | OsPT13(64) | 0 | GGDYPLSA<br>TIMSE |
| TaPT33-7D | TraesCS7D<br>02G064900 | 7D | 36043328  | 36045147  | -1 | 1671 | 556 | 10 | OsPT13(63) | 0 | GGDYPLSA<br>TIMSE |
| TaPT34-Un | TraesCSU0<br>2G070800  | Un | 61731351  | 61732928  | -1 | 1578 | 525 | 12 | OsPT2(81)  | 0 | GGDYPLSA<br>TIMSE |

**Table S2.** Conserved motifs identified in the TaPHT1 family proteins.

| <b>Conserved motif sequences</b>                                                                               | <b>Motif ID</b> | <b>Motif length</b> | <b>Site number</b> |
|----------------------------------------------------------------------------------------------------------------|-----------------|---------------------|--------------------|
| RRHGLHLLGTTSTWFLLDIAFYSQL<br>FKDIFTAIGWIPPAKTMSALEEVYRI<br>ARAQALIALCGTVPGYWFTVAFIDIIG<br>RFAIQLMGFFMMTVFMLGLA | Motif 1         | 113                 | 50                 |
| HTPKGVMATLCFFRFWLGFGGDYP<br>LSATIMSEYANKKTRGAFIAAVFAMQ<br>GFGIL                                                | Motif 2         | 57                  | 56                 |
| PZADYVWRILMFGAIPALLTYWRM<br>KMPETARYTALVAKNAQAASDMSK<br>VLQVEI                                                 | Motif 3         | 57                  | 56                 |
| VVLYALTFFFANFGPNSTTFIVPAEIFP<br>ARLRSTCHGISAAAGKAGAIVGAFGF<br>LYA                                              | Motif 4         | 57                  | 56                 |
| ZQLNLVKALDVAKTQLYHFTAIVIAG<br>MGFFTDAYDLFCISLVTKLLGRIYYTD<br>PASN                                              | Motif 5         | 57                  | 55                 |
| PGTLPPNVSAAVNGVALCGTLAQFL<br>FGWLGDKLGRKSVYGMTLILMVJCSI<br>ASGLS                                               | Motif 6         | 57                  | 42                 |
| QDQKKPDAGYPPGIGVRNSLFLVLAGT<br>NFLGLLFTFLVPESK                                                                 | Motif 7         | 41                  | 39                 |
| GGIVTJIVSSAFRAAFPAPAYQDDAAA<br>ST                                                                              | Motif 8         | 29                  | 42                 |
| GKSLEELSGENEDDE                                                                                                | Motif 9         | 15                  | 56                 |
| EEDVQGERAKGBEFLFSRZF                                                                                           | Motif 10        | 21                  | 54                 |
| LCGTVLGQLFFGWLGDRMGRKRIYG<br>VTLKLMVVCSLASGLS                                                                  | Motif 11        | 41                  | 13                 |
| WPARRHACSSLFCHLHGAGSAMLRY<br>VLDVAVTSVKCETRRAR                                                                 | Motif 12        | 41                  | 6                  |
| HTSIRSSLLLLAGCNLVGVMFTLLPE<br>SK                                                                               | Motif 13        | 29                  | 14                 |
| EPPGYSATVAEVEFIGRVEIQ                                                                                          | Motif 14        | 21                  | 12                 |
| RRHGRDLLATSVCWFLLDVVFYSLN<br>LFMKDIFS                                                                          | Motif 15        | 33                  | 6                  |
| GAVVLVLSARFKNTAAYETDQ                                                                                          | Motif 16        | 21                  | 6                  |
| PPYSTYWQPHSSMN                                                                                                 | Motif 17        | 14                  | 7                  |
| LPGNVAGAVSG                                                                                                    | Motif 18        | 11                  | 7                  |
| DQARAAAVQPS                                                                                                    | Motif 19        | 11                  | 6                  |
| MARSEQ                                                                                                         | Motif 20        | 6                   | 6                  |

**Table S3.** The parameters of selection pressure on duplicated gene pairs of the TaPHT1 family.

| Duplication type      | duplicated gene_1 | duplicated gene_2 | Ka        | Ks        | Ka_Ks     | Divergence time<br>(million years) |
|-----------------------|-------------------|-------------------|-----------|-----------|-----------|------------------------------------|
| Tandem duplication    | TaPT5-4A          | TaPT6-4A          | 0.0016543 | 0.0229805 | 0.0719853 | 1.75                               |
| Tandem duplication    | TaPT7-4A          | TaPT8-4A          | 8.87E-04  | 0.0728183 | 0.0121781 | 5.55                               |
| Tandem duplication    | TaPT7-4A          | TaPT9-4A          | 0.0075741 | 0.1165856 | 0.0649663 | 8.89                               |
| Tandem duplication    | TaPT7-4A          | TaPT10-4A         | 0.0084646 | 0.1585604 | 0.0533841 | 12.09                              |
| Tandem duplication    | TaPT8-4A          | TaPT9-4A          | 0.0064181 | 0.0942791 | 0.0680752 | 7.19                               |
| Tandem duplication    | TaPT8-4A          | TaPT10-4A         | 0.0072733 | 0.1615909 | 0.0450106 | 12.32                              |
| Tandem duplication    | TaPT9-4A          | TaPT10-4A         | 0.0025426 | 0.1486327 | 0.0171063 | 11.33                              |
| Tandem duplication    | TaPT13-4A         | TaPT14-4A         | 0.0041867 | 0.0442741 | 0.0945641 | 3.37                               |
| Tandem duplication    | TaPT16-4B         | TaPT17-4B         | 0.0046928 | 0.1590135 | 0.0295123 | 12.12                              |
| Tandem duplication    | TaPT16-4B         | TaPT18-4B         | 0.0072723 | 0.1976424 | 0.0367951 | 15.06                              |
| Tandem duplication    | TaPT17-4B         | TaPT18-4B         | 0.0076412 | 0.1845701 | 0.0414001 | 14.07                              |
| Tandem duplication    | TaPT20-4D         | TaPT21-4D         | 0.003838  | 0.0275984 | 0.1390647 | 2.10                               |
| Tandem duplication    | TaPT24-5B         | TaPT25-5B         | 8.25E-04  | 0.0126425 | 0.0652894 | 0.96                               |
| Tandem duplication    | TaPT27-5D         | TaPT28-5D         | 0.0010059 | 0.0284694 | 0.0353315 | 2.17                               |
| Segmental duplication | TaPT1-2B          | TaPT2-2D          | 0.0282761 | 0.0908912 | 0.3110978 | 6.93                               |
| Segmental duplication | TaPT4-4A          | TaPT15-4B         | 0.009194  | 0.0992198 | 0.0926629 | 7.56                               |
| Segmental duplication | TaPT4-4A          | TaPT19-4D         | 0.0056    | 0.0564852 | 0.0991415 | 4.31                               |
| Segmental duplication | TaPT15-4B         | TaPT19-4D         | 0.0088107 | 0.0701506 | 0.1255965 | 5.35                               |
| Segmental duplication | TaPT5-4A          | TaPT27-5D         | 0.0016538 | 0.0994298 | 0.0166329 | 7.58                               |
| Segmental duplication | TaPT8-4A          | TaPT20-4D         | 0.001705  | 0.1411279 | 0.0120815 | 10.76                              |
| Segmental duplication | TaPT8-4A          | TaPT16-4B         | 0.0025594 | 0.1991236 | 0.0128531 | 15.18                              |
| Segmental duplication | TaPT20-4D         | TaPT16-4B         | 8.52E-04  | 0.1227793 | 0.0069385 | 9.36                               |
| Segmental duplication | TaPT12-4A         | TaPT31-7A         | 0.0104127 | 0.1357074 | 0.0767288 | 10.34                              |
| Segmental duplication | TaPT14-4A         | TaPT33-7D         | 0.0337799 | 0.277618  | 0.1216775 | 21.16                              |
| Segmental duplication | TaPT10-4A         | TaPT17-4B         | 0.0059364 | 0.1944441 | 0.0305303 | 14.82                              |
| Segmental duplication | TaPT17-4B         | TaPT10-4A         | 0.0059364 | 0.1944441 | 0.0305303 | 14.82                              |
| Segmental duplication | TaPT17-4B         | TaPT21-4D         | 0.0033841 | 0.0697553 | 0.0485139 | 5.32                               |
| Segmental duplication | TaPT10-4A         | TaPT21-4D         | 0.0025391 | 0.1811328 | 0.0140182 | 13.81                              |
| Segmental duplication | TaPT20-4D         | TaPT10-4A         | 0.005554  | 0.1681628 | 0.0330275 | 12.82                              |
| Segmental duplication | TaPT10-4A         | TaPT16-4B         | 0.006413  | 0.2180172 | 0.0294153 | 16.62                              |
| Segmental duplication | TaPT29-6A         | TaPht-myc         | 0.0104714 | 0.0644144 | 0.1625626 | 4.91                               |
| Segmental duplication | TaPT29-6A         | TaPT30-6D         | 0.004169  | 0.0414972 | 0.1004645 | 3.16                               |
| Segmental duplication | TaPht-myc         | TaPT30-6D         | 0.0087812 | 0.0645276 | 0.1360844 | 4.92                               |

**Table S4.** Primers names and sequences used in this study.

| <b>Name</b> | <b>Phytozome ID/<br/>Genbank ID</b> | <b>Sequence (5'-3')</b>  | <b>Primers<br/>purpose</b> |
|-------------|-------------------------------------|--------------------------|----------------------------|
| TaPT1-2B-F  | TraesCS2B02G059100.1                | TCAGGCTGCTTGACATTGAC     |                            |
| TaPT1-2B-R  |                                     | GACGGCGAATCCATATTTGT     |                            |
| TaPT2-2D-F  | TraesCS2D02G045600.1                | CTTATGCTAGTGTCTTGGTGC    |                            |
| TaPT2-2D-R  |                                     | AGGGACATATGTTGCCCTGC     |                            |
| TaPT3-2D-F  | TraesCS2D02G045700.1                | AGCCAACACAGGCATTGA       |                            |
| TaPT3-2D-R  |                                     | GAAGAGGTCGTAGGCATCAGT    |                            |
| TaPT4-4A-F  | TraesCS4A02G301100.1                | ATCGCCTTCTACAGCCAGA      |                            |
| TaPT4-4A-R  |                                     | TCACGAACACCTCTTTGAGC     |                            |
| TaPT5-4A-F  | TraesCS4A02G359900.1                | GACGCTGATTCTCATGGTCA     |                            |
| TaPT5-4A-R  |                                     | CGTACTCGGACATGATGGTG     |                            |
| TaPT6-4A-F  | TraesCS4A02G360000.1                | GTGGTTCCTGCTGGACATC      |                            |
| TaPT6-4A-R  |                                     | ATCCAGTTGATGCTCGTGAA     |                            |
| TaPT7-4A-F  | TraesCS4A02G416300.1                | GCGATTATCCTCTCAGCGCC     |                            |
| TaPT7-4A-R  |                                     | GACGAGACGATGATTGTGACGATA |                            |
| TaPT8-4A-F  | TraesCS4A02G416400.1                | ATGTCGGAGTATGCTAAC       |                            |
| TaPT8-4A-R  |                                     | CAAATAGGATGCCAAACC       |                            |
| TaPT9-4A-F  | TraesCS4A02G416500.1                | CTGGGTCTGCTCTTTTCGCT     | q RT-PCR                   |
| TaPT9-4A-R  |                                     | AATGGAGTCATCGTCGCCAA     | analysis                   |
| TaPT10-4A-F | TraesCS4A02G416600.1                | GAAAGCGCTGGACGTTGCC      |                            |
| TaPT10-4A-R |                                     | GCAGGGTCGGTGTAGTAGATG    |                            |
| TaPT11-4A-F | TraesCS4A02G417900.1                | ATGTTCACTCTTGCCTTG       |                            |
| TaPT11-4A-R |                                     | CGTTTCTTCCTCCATTT        |                            |
| TaPT12-4A-F | TraesCS4A02G418000.1                | CGGAGAAATGGAGGAAGAAAG    |                            |
| TaPT12-4A-R |                                     | ACGCTGTGGATGAACTCA       |                            |
| TaPT13-4A-F | TraesCS4A02G418300.1                | TGAAGATGCCTGAGACGGC      |                            |
| TaPT13-4A-R |                                     | GAGGACGAACCAACACGTAGTC   |                            |
| TaPT14-4A-F | TraesCS4A02G418400.1                | GGTAAGTGTGGTGCCATCATT    |                            |
| TaPT14-4A-R |                                     | AGGTGGTTCGCTTTCTTCC      |                            |
| TaPT15-4B-F | TraesCS4B02G013200.1                | ACATCTTCCCAGCCATCAAC     |                            |
| TaPT15-4B-R |                                     | ACCCAGTAGCCTGGGAAAGT     |                            |
| TaPT16-4B-F | TraesCS4B02G317000.1                | GACATCATTGGGAGGTTT       |                            |
| TaPT16-4B-R |                                     | CAAGTAGTCGTAAGGTATGG     |                            |
| TaPT17-4B-F | TraesCS4B02G317100.1                | ACACAAACAAGAGAGAACCAGA   |                            |
| TaPT17-4B-R |                                     | GGGTCGGTGTAGTAGATGCG     |                            |

|             |                      |                        |
|-------------|----------------------|------------------------|
| TaPT18-4B-F | TraesCS4B02G317200.1 | AACTGCACGGTACACAGCAC   |
| TaPT18-4B-R |                      | GAGAAGAGGCCCCAGGTATC   |
| TaPT19-4D-F | TraesCS4D02G010900.1 | CCGCCATTTTCCTCCAC      |
| TaPT19-4D-R |                      | TCTCGGGCATCTTCATCC     |
| TaPT20-4D-F | TraesCS4D02G313700.1 | CGCCTTCATCGACATTATTGGG |
| TaPT20-4D-R |                      | ACGCATACAGGAACCCGAAC   |
| TaPT21-4D-F | TraesCS4D02G313800.1 | TCGGAATATGCTAACAAGA    |
| TaPT21-4D-R |                      | CAAATAGGATGCCAAACC     |
| TaPT22-5A-F | TraesCS5A02G460300.1 | CGTTTCGAGTCGCCAGTAAA   |
| TaPT22-5A-R |                      | GAGGGAACGCTGGGATCAAA   |
| TaPT23-5B-F | TraesCS5B02G470100.1 | ACCGACGCCTACGACCT      |
| TaPT23-5B-R |                      | GCCAGCCGAAGAAGAGC      |
| TaPT24-5B-F | TraesCS5B02G512000.1 | CATCATCCTCATGCTCGGCG   |
| TaPT24-5B-R |                      | GAGCTCGTCCATCTTCTCCG   |
| TaPT25-5B-F | TraesCS5B02G512100.1 | CTACACCGACCTCTCCAAGC   |
| TaPT25-5B-R |                      | GATGGAGCAGATGACCATGA   |
| TaPT26-5D-F | TraesCS5D02G472000.1 | CTTCACGAGCATCAACTGGA   |
| TaPT26-5D-R |                      | ACGACGTCGATGAGGAAGAC   |
| TaPT27-5D-F | TraesCS5D02G512900.1 | CACCATCATGTCCGAGTACG   |
| TaPT27-5D-R |                      | AAGGCGGATGAGATGATGAG   |
| TaPT28-5D-F | TraesCS5D02G513000.1 | GACGCTCATTCTCATGGTCA   |
| TaPT28-5D-R |                      | CGTACTCGGACATGATGGTG   |
| TaPT29-6A-F | TraesCS6A02G223800.1 | ACGTACGCGGAAGACCCCAT   |
| TaPT29-6A-R |                      | TGTCCTGCTCGCCGCTGAAC   |
| TaPht-myc-F | TraesCS6B02G257500.1 | GCGTATGACGAAGACCACAT   |
| TaPht-myc-R |                      | TGTCCTGCTCGCCGCTGAGT   |
| TaPT30-6D-F | TraesCS6D02G211600.1 | GCGTACGCAGAAGACCACAT   |
| TaPT30-6D-R |                      | TGTCCTGCTCGCCGCTGAAT   |
| TaPT31-7A-F | TraesCS7A02G070000.1 | AGACCTACAAGATAGCCCGC   |
| TaPT31-7A-R |                      | AGGATGAAAGTGGTGGAGTTG  |
| TaPT32-7D-F | TraesCS7D02G064200.1 | GGAACAGCTGTCGTCGTCTT   |
| TaPT32-7D-R |                      | AATTGGCAGCTTTGCTGACG   |
| TaPT33-7D-F | TraesCS7D02G064900.1 | TAAGTGTGGTGCCATCAT     |
| TaPT33-7D-R |                      | CTGCCAGAAGAAGGAGAG     |
| TaPT34-Un-F | TraesCSU02G070800.1  | CAAATAGGATGCCAAACC     |
| TaPT34-Un-R |                      | GGAATATGCTAACAAGAAGA   |
| TaActin-F   | KC775780.1           | CCAGGTATCGCTGACCGTAT   |
| TaActin-R   |                      | GCTGAGTGAGGCTAGGATGG   |

|              |                      |                                    |                 |
|--------------|----------------------|------------------------------------|-----------------|
| TaPR4a-F     |                      | CGTCTTCACCAAGATCGACA               |                 |
| TaPR4a-R     | AJ006098.1           | GGCAGTCGACGAACTGGTA                |                 |
| TaPR4b-F     |                      | CTTCACCAAGATCGACACCA               |                 |
| TaPR4b-R     | AJ006099.1           | AGCAAGCTAGCCTTGATCG                |                 |
| TaPR2-F      |                      | CCGGCCATACTACCCGGC                 |                 |
| TaPR2-R      | DQ090946.1           | ACACCTTGATGGCGCTGAGA               |                 |
| TaPR10-F     |                      | ACGGAGCGGATGTGGAAG                 |                 |
| TaPR10-R     | CV778999.1           | GCCACCTGCGACTTGAGC                 |                 |
| TaPT29-6A-F1 |                      | GGAATTCATGGCACGGCAGCAGC            | Subcellular     |
| TaPT29-6A-R1 | TraesCS6A02G223800.1 | CGGTTCGACCTACAAGGGAAGAACCT         | location vector |
| TaPT29-6A-F2 |                      | GTGAGTAAGGTTACCGAATCAGCGGCGAGCAGG  | construct       |
| TaPT29-6A-R2 | TraesCS6A02G223800.1 | CGTGAGCTCGGTACCGGA ACTTGATGTCCCTGA | VIGS vector     |
|              |                      |                                    | construct       |

**Table 5.** Promoter elements in each *TaPHT1* gene.

| Gene name | P1BS<br>(GNATATNC) | OSEROOTNODULE<br>(AAAGAT) | NODCON2GM<br>(CTCTT)       | Root motif box<br>(ATATT/AATAT)                                                 | W-box<br>(TTGACY)  |
|-----------|--------------------|---------------------------|----------------------------|---------------------------------------------------------------------------------|--------------------|
| TaPT1-2B  | -1098              | -875                      | -1489, -1454               | -1497, -1034, -882, -736, -711, -504                                            | -1653              |
| TaPT2-2D  | -810               | -564                      | -175                       | -852, -750, -508, -385, -277, -48                                               | –                  |
| TaPT3-2D  | –                  | –                         | -512                       | -595, -280, -154                                                                | –                  |
| TaPT4-4A  | -605, -318         | –                         | -1640                      | -1223, -1211, -913                                                              | -976, -798, -679   |
| TaPT5-4A  | –                  | –                         | -1874, -1733, -1136, -539  | –                                                                               | –                  |
| TaPT6-4A  | -1273              | -1644                     | –                          | -1874, -1851, -1694, -1603, -1468, -1406, -1357, -1325, -1272, -353, -294, -162 | -1299              |
| TaPT7-4A  | -1556, -640, -422  | -44                       | -1692, -598                | -1811, -1687, -1554, -1538, -1451, -855, -248, -140                             | -1997, -1965, -474 |
| TaPT8-4A  | -447, -126         | –                         | -1952, -1548, -1531, -1439 | -973, -461                                                                      | -1527, -1333       |
| TaPT9-4A  | -633, -385         | –                         | -1413, -1330, -1148, -875  | -1936, -1852, -1805, -668, -401, -203, -                                        | -1031, -437, -215  |



|           |                   |             |                              |                                                                               |                                 |
|-----------|-------------------|-------------|------------------------------|-------------------------------------------------------------------------------|---------------------------------|
|           |                   |             |                              | 137, -113                                                                     |                                 |
| TaPT10-4A | -1541, -675       | —           | -1942, -1921, -288           | -1901, -1691, -1523, -1270, -1142, -945, -798, -451, -240, -173, -130         | -728, -252                      |
| TaPT11-4A | —                 | —           | -452                         | -649, -557, -118                                                              | -1965, -1713, -1228             |
| TaPT12-4A | —                 | —           | -1720                        | -1972, -842, -732, -690, -445                                                 | -1628                           |
| TaPT13-4A | -1155             | -992        | -1582, -32                   | -1119, -877, -218                                                             | —                               |
| TaPT14-4A | -1542             | -1348, -914 | -1233                        | -687, -128                                                                    | -1606                           |
| TaPT15-4B | -514, -225        | —           | —                            | -931, -513, -224                                                              | -715, -596                      |
| TaPT16-4B | -1623, -644, -423 | -44         | -1358, -602                  | -1827, -1564, -1477, -1290, -1149, -248                                       | -475                            |
| TaPT17-4B | -1703, -1464      | —           | -593                         | -1791, -1584, -1462, -1083, -829, -141                                        | -1516, -1295, -1252, -838, -651 |
| TaPT18-4B | -1621, -391       | —           | -945                         | -1751, -1603, -1550, -1365, -1233, -674, -208, -142                           | -1856, -443, -220               |
| TaPT19-4D | -600, -316        | —           | -1587                        | -1202, -1190, -913                                                            | -1117, -1102, -798              |
| TaPT20-4D | -1881, -997       | —           | -1342, -1201, -613           | -1592                                                                         | -1933, -1713, -855              |
| TaPT21-4D | -1458, -399       | —           | —                            | -1831, -1600, -1587, -1440, -1387, -1199, -1067, -676, -415, -218, -152, -124 | -1688, -451, -230, -198         |
| TaPT22-5A | -1088, -346       | —           | -917, -537                   | -1729, -879, -676, -657, -491                                                 | -1619, -1090, -1123             |
| TaPT23-5B | -1422, -316       | —           | -1039, -712, -479, -404, -69 | -1726, -661, -627                                                             | -1527, -1457, -1267             |
| TaPT24-5B | —                 | -1708       | -1894, -1362                 | -1684, -1664, -842, -730, -632, -329, -290, -163, -157                        | -1837                           |
| TaPT25-5B | —                 | -1708       | -1894, -1362                 | -1663, -841, -631, -328, -290, -156                                           | -362                            |

|           |             |             |                        |                                                              |                            |
|-----------|-------------|-------------|------------------------|--------------------------------------------------------------|----------------------------|
| TaPT26-5D | -1568       | –           | -1455, -484            | -1863,-1006, -713, -684, -306                                | -1676, -1603, -1401        |
| TaPT27-5D | -1863       | -1873       | -1550                  | -1580, -1237, -411, -261                                     | -1512, -1499, -1494        |
| TaPT28-5D | –           | -645        | -1116, -1065           | -1700, -714, -590, -566, -286                                | -588                       |
| TaPT29-6A | -1722, -696 | -1016       | –                      | -1047, -694, -622                                            | -595                       |
| TaPht-myc | -218        | -1843       | -1257                  | -1212, -752, -653                                            | -975, -626, -427           |
| TaPT30-6D | –           | -1506, -410 | -1289                  | -1843, -1537, -1265, -697, -675                              | -1395, -1013, -809, -598   |
| TaPT31-7A | -1375       | -1158       | -431                   | -824, -118                                                   | -1870, -1555, -1225, -1119 |
| TaPT32-7D | -1073       | -1669, -879 | –                      | -1913, -1830, -1772, -1685, -1678, -1657, -1030, -1014, -364 | –                          |
| TaPT33-7D | –           | –           | -1580, -732, -542, -97 | -600, -199, -92                                              | -1203, -1033, -729         |
| TaPT34-Un | -1874, -997 | –           | -1201, -613            | -1700, -1592                                                 | -1926, -1712, -855         |

|           |                                                                                                              |     |
|-----------|--------------------------------------------------------------------------------------------------------------|-----|
| TaPT29-6A | MARCCQLQVLHALDVARTQRYHAWAVVIAGMGFFADAYDIFCITLVTKLLGRIYYQVPGQREPGMLPRRIEAAINGVTFCGMIVGQLLFGWLGDVGRKMF         | 100 |
| TaPT30-6D | MARCCQLQVLHALDVARTQRYHAWAVVIAGMGFFADAYDIFCITLVTKLLGRIYYQVPGQREPGMLPRRIEAAINGVTFCGMIVGQLLFGWLGDVGRKMF         | 100 |
| TaPht-myc | MARCCQLQVLHALDVARTQRYHAWAVVIAGMGFFADAYDIFCITLVTKLLGRIYYQVPGQREPGMLPRRIEAAINGVTFCGMIVGQLLFGWLGDVGRKMF         | 100 |
| Consensus | marcqlqvlhaldvartqryhawavviagmgffadaydifcitolvtkllgriyy vpgq pgmlprrieaaingvtfcgmivgqllfgwlgdkvgrk f         |     |
| TaPT29-6A | YGKTIIMLMINGSFLSGLSFGNTADGVMATLCFFRFWLGVGIGGDYPLSATIIESEYSNKRTRGSLIAAVFAMEGFGILAGCIVTLVVSATFCAREDPPTIYA      | 200 |
| TaPT30-6D | YGKTIIMLMINGSFLSGLSFGNTADGVMATLCFFRFWLGVGIGGDYPLSATIIESEYSNKRTRGSLIAAVFAMEGFGILAGCIVTLVVSATFCARENPPAYA       | 200 |
| TaPht-myc | YGKTIIMLMINGSFLSGLSFGNTADGVMATLCFFRFWLGVGIGGDYPLSATIIESEYSNKRTRGSLIAAVFAMEGFGILAGCIVTLVVSATFCARENPPAYD       | 200 |
| Consensus | ygktimlmingsflsglisfgntadgvmatlcffrfwlgvgiggdyp lsatiieseysnkrtrgsliaavfamegfgilagcivtlvvsatfqarf pp y       |     |
| TaPT29-6A | EDFMASVPPQADYVWRIILMVGAI PAVFTYRWRVMPETARYTALVARDAEKAARDMSKVLKVEFSGEQDKIEGFTKDRDYGVFSRRFARRHGWHLVGAV         | 300 |
| TaPT30-6D | EDFMASVPPQADYVWRIILMVGAI PAVFTYRWRVMPETARYTALVARDAEKAARDMSKVLKVEFSGEQDKIEGFTKDRDYGVFSRRFARRHGWHLVGAV         | 300 |
| TaPht-myc | EDFMASVPPQADYVWRIILMVGAI PAVFTYRWRVMPETARYTALVARDAEKAARDMSKVLKVEFSGEQDKIEGFTKDRDYGVFSRRFARRHGWHLVGAV         | 300 |
| Consensus | ed masvppqadyvwrililmvgaipavftyrrwvmpetarytalvardaekaardmskvlkve sgeqdkiegftkdrdygvfsrrfarrhgwhlvgav         |     |
| TaPT29-6A | ASWFVLDIVFYSQIILQEEIFRDIKWIP EANSMSALEEAYRVARAQAI IALCGTLPGYWFTIAFVDDVGRKAIQFLGFTMMKGLMLVVAGFYHCLTQPGR       | 400 |
| TaPT30-6D | ASWFVLDIVFYSQIILQEEIFRDIKWIP EANSMSALEEAYRVARAQAI IALCGTLPGYWFTIAFVDDVGRKAIQFLGFTMMKGLMLVVAGFYHCLTQPGR       | 400 |
| TaPht-myc | ASWFVLDIVFYSQIILQEEIFRDIKWIP EANSMSALEEAYRVARAQAI IALCGTLPGYWFTIAFVDDVGRKAIQFLGFTMMKGLMLVVAGFYHCLTQPGR       | 400 |
| Consensus | aswfvldivfysqiilqeeifrdikwip eansmsaleeayrvaraqaiaialcgtlpgywftiafvddvgrkaiqflgftmmkgmlvvagf yhq l t q p g r |     |
| TaPT29-6A | RIWLVMYAFTFF FANFGPNS TTFIIPAEI FPAHVRTTCHGISSAAGKVGAI VGTGFGFLYASQRADGSNEI ETGYPSGIGVRASLFLVLAACNVLGIIFTC   | 500 |
| TaPT30-6D | RIWLVMYAFTFF FANFGPNS TTFIIPAEI FPAHVRTTCHGISSAAGKVGAI VGTGFGFLYASQRADGSNEI ETGYPSGIGVRASLFLVLAACNVLGIIFTC   | 500 |
| TaPht-myc | RIWLVMYAFTFF FANFGPNS TTFIIPAEI FPAHVRTTCHGISSAAGKVGAI VGTGFGFLYASQRADGSNEI ETGYPSGIGVRASLFLVLAACNVLGIIFTC   | 500 |
| Consensus | riwlvmyaftfffanfgpns tfiipaei fpahvrttchgissaagkvgaivgtgfgflyasqradgsne etgypsgigvraslflvlaacnvlgiiftc       |     |
| TaPT29-6A | LLPEPNRSLEEVSGEPINGEDADLGDSKVL P                                                                             | 532 |
| TaPT30-6D | LLPEPNRSLEEVSGEPINGEDADLGDSKVL P                                                                             | 532 |
| TaPht-myc | LLPEPNRSLEEVSGEPINGEDADLGDSKVL P                                                                             | 532 |
| Consensus | llpepnrsleevsgepingedadlgdskvlp                                                                              |     |

**Figure S1.** Alignment of TaPT29-6A, TaPT30-6D and TaPht-myc protein sequences using DNAMAN software. The sequence used to construct the TRV: *TaPT29-6A* vector is shown in the rectangle.



Motif 7

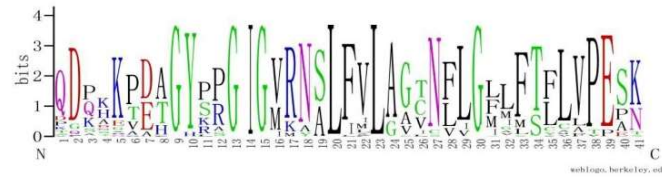

Motif 8

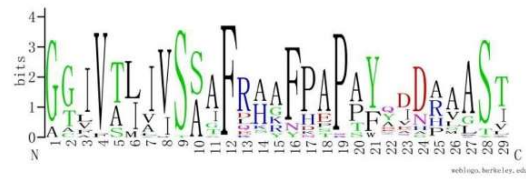

Motif 9

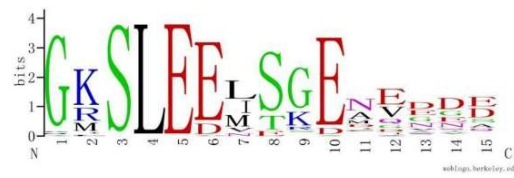

Motif 10

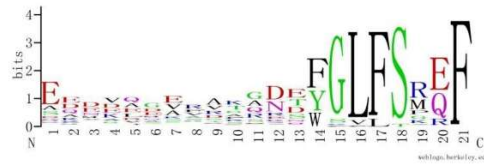

Motif

11

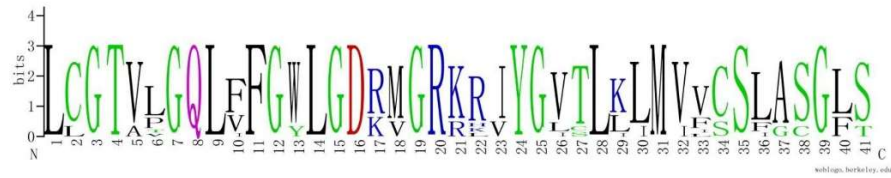

Motif 12

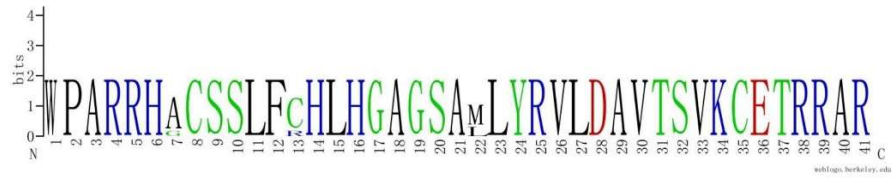

Motif 13

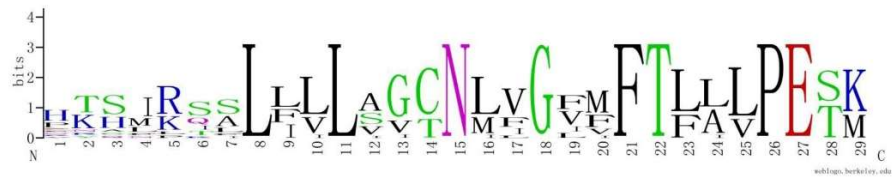



### Motif 14

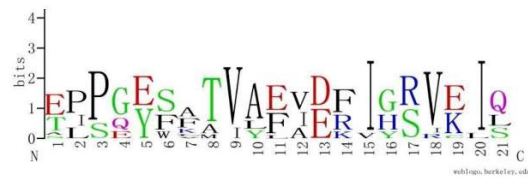

### Motif 15

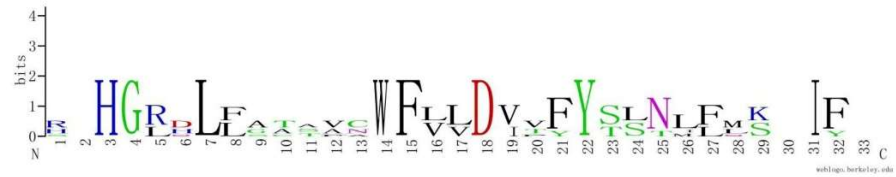

### Motif 16

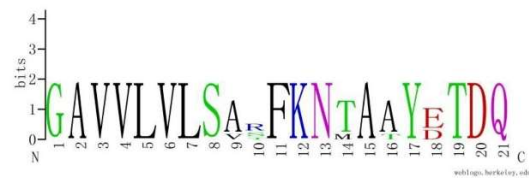

### Motif 17

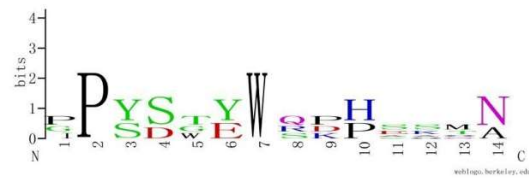

### Motif 18

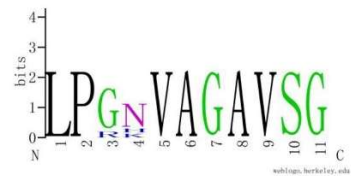

### Motif 19

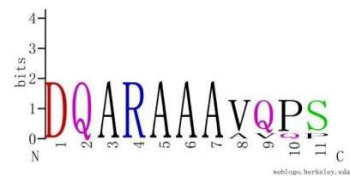

### Motif 20

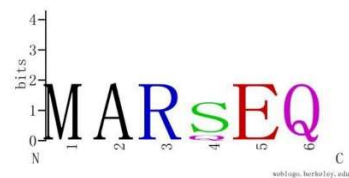

**Figure S2.** Twenty conserved motifs of a set of 57 PHT1 protein sequences identified by MEME and visualized using Weblogo. The parameters were as follows: motif count, 20; motif sites, 6 to 200; motif

width, 6 to 200; site distribution, zero or one occurrence per sequence; discovery mode, optimal E-value of the motif information content.

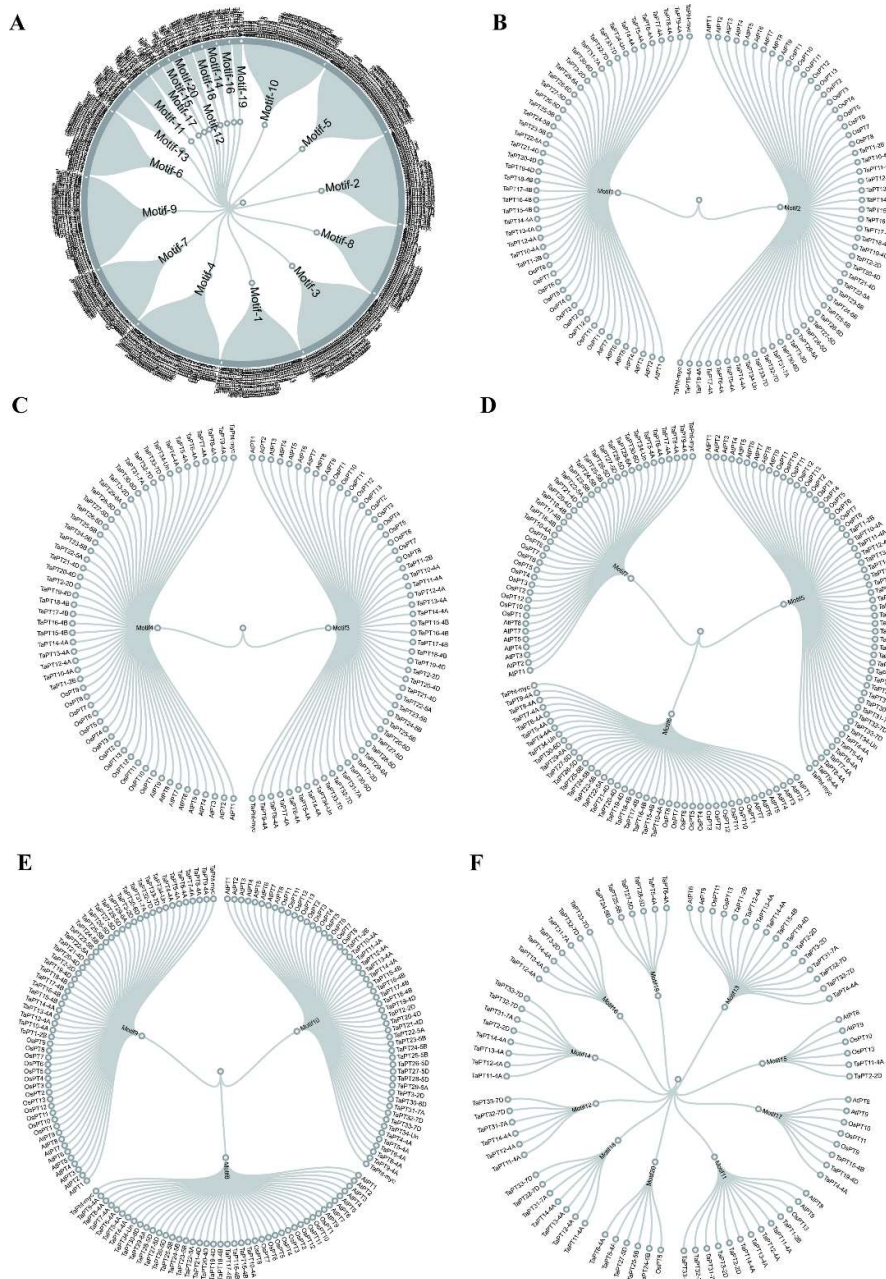

**Figure S3.** Clustering diagram of the PHT1 family in *Arabidopsis*, rice and wheat based on the presence or absence of motifs. (A) Clustering of all PHT1 members based on all the motifs. (B) Clustering of PHT1 proteins containing motifs 1 and 2. (C) Clustering of PHT1 proteins containing motifs 3 and 4. (D) Clustering of PHT1 proteins containing motifs 5, 6 and 7. (E) Clustering of PHT1 proteins containing motifs 8, 9 and 10 were clustered. (F) Clustering of PHT1 proteins containing motifs 11-20.

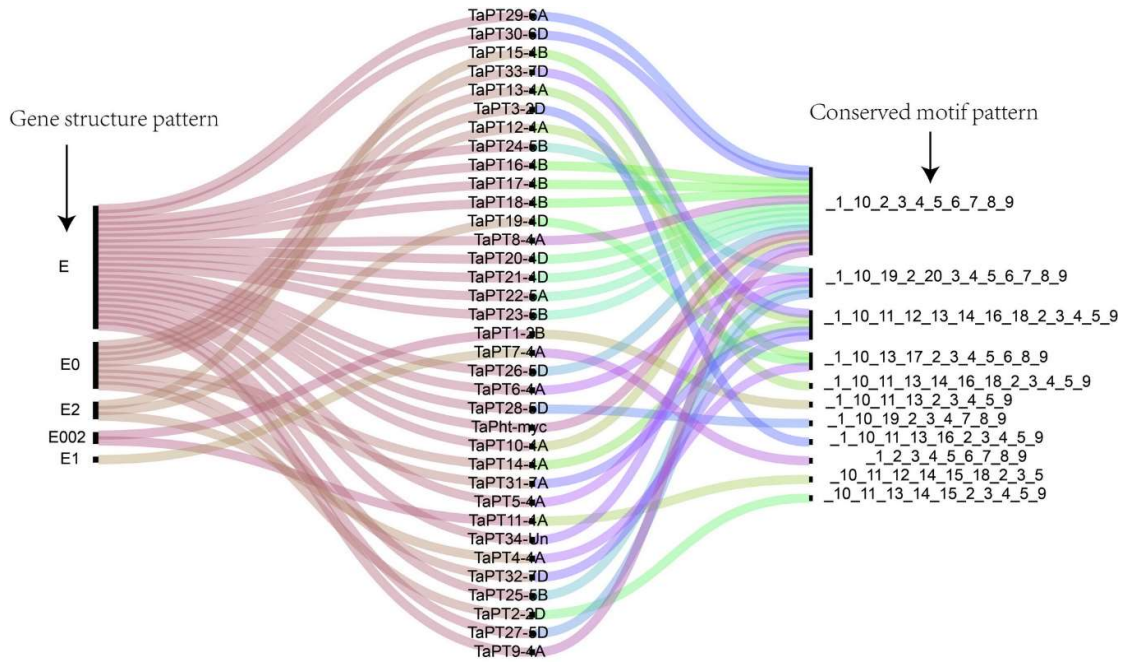

**Figure S4.** Alluvial diagram of correlations between gene structures and motif architectures in members of the PHT1 family in wheat.



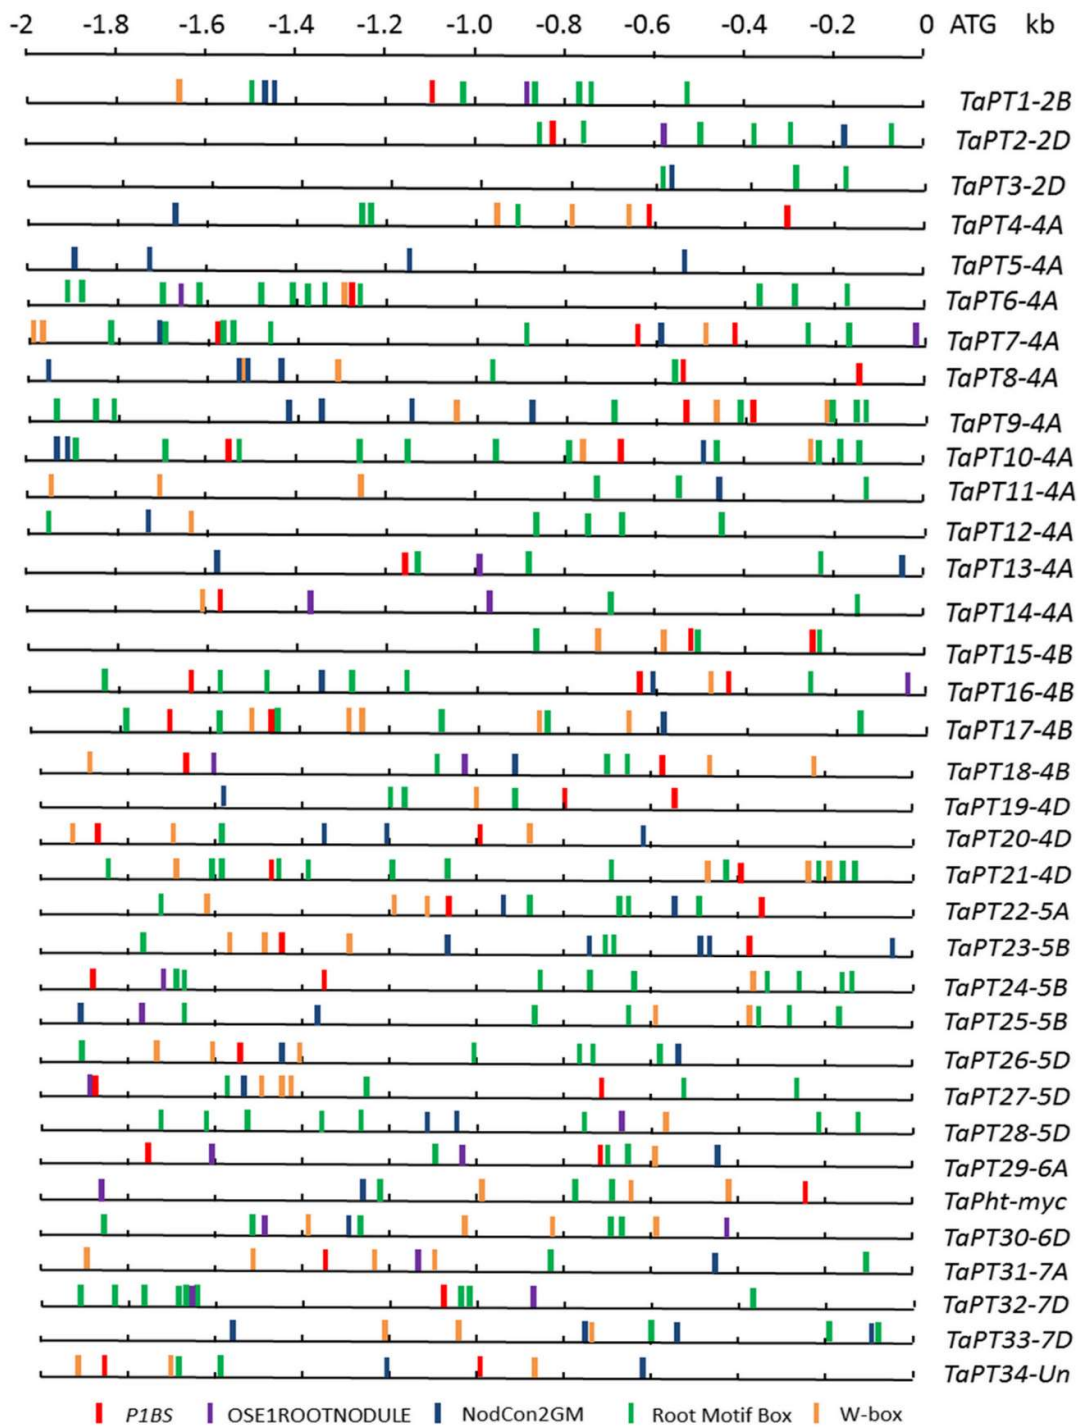

**Figure S5.** Putative *cis*-regulatory elements involved in Pi and AM responses in the promoter sequences of the 35 *TaPHT1* genes.

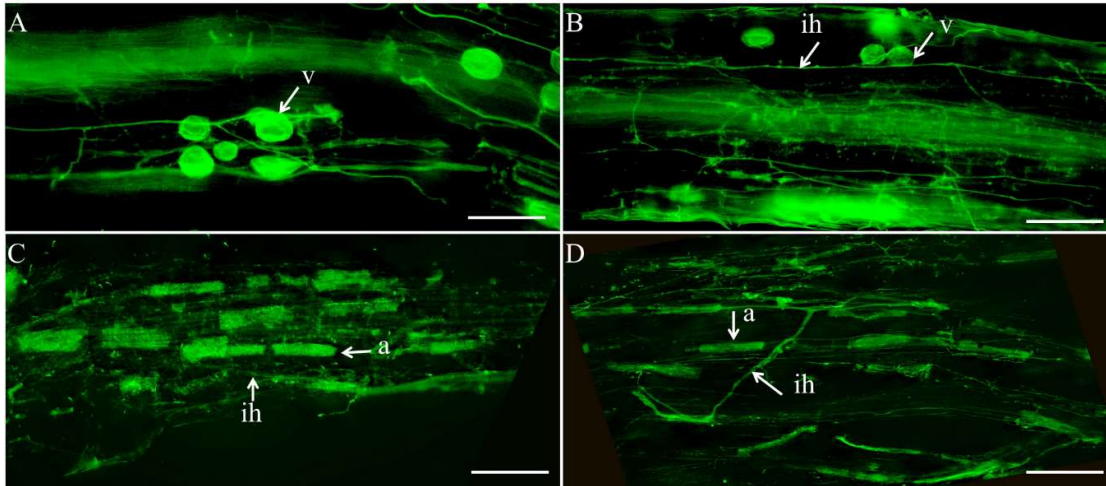

**Figure S6.** AM symbiotic wheat roots stained with WGA-AlexaFluor 488 to reveal fungal structures, including: internal hyphae (ih), vesicles (v) and arbuscules (a). Wheat roots were colonized with *G. versiforme* (A and C) and *F. mosseae* (B and D). Bar=20  $\mu$ m.

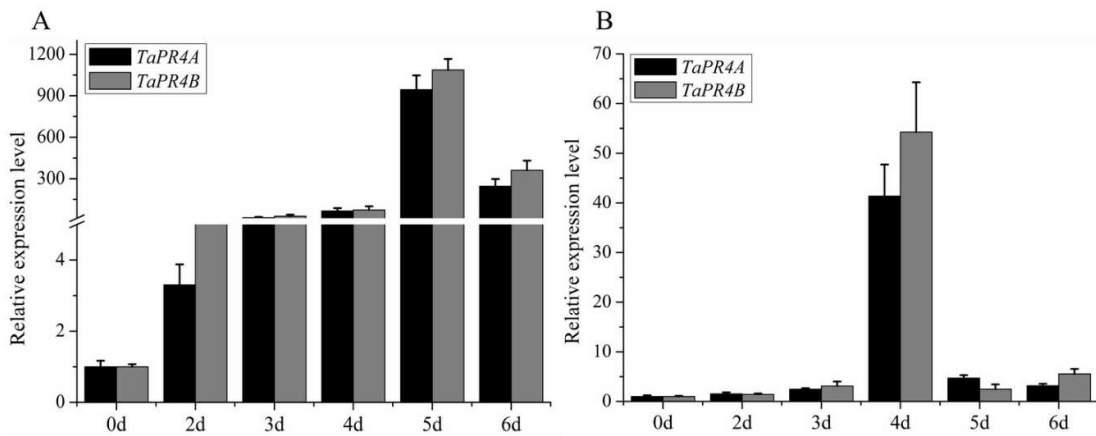

**Figure S7.** Relative expression levels of *TaPR4A* and *TaPR4B* marker genes in *Ggt* (A) and *B. sorokiniana* (B) infected wheat roots at indicated time-points. Bars represent means of three biological replications with standard errors.
